# Supplementary material for: A Cohort study evaluation of maternal PCB exposure related to time to pregnancy in daughters
Source: PubMed Central journal article supplement (PMC3766643; doi:10.1186/1476-069x-12-66), 2013-08-20

**Additional file Figures and Table**

**Figure S1:** Histograms for bootstrap distributions of weights for the PCB congeners in the weighted quartile score with a positive slope parameter in a Weibull proportional hazards model adjusted for race (African American vs all other) and whether the daughter was breast fed (yes or no).

**Estrogenic and persistent**

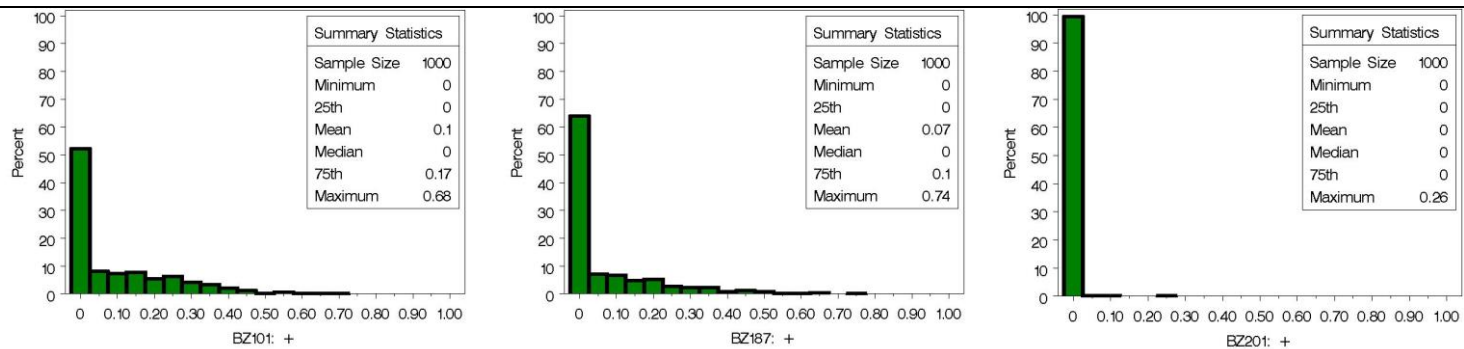

**Anti-estrogenic, immunotoxic, dioxin like (non-ortho, mono-ortho)**

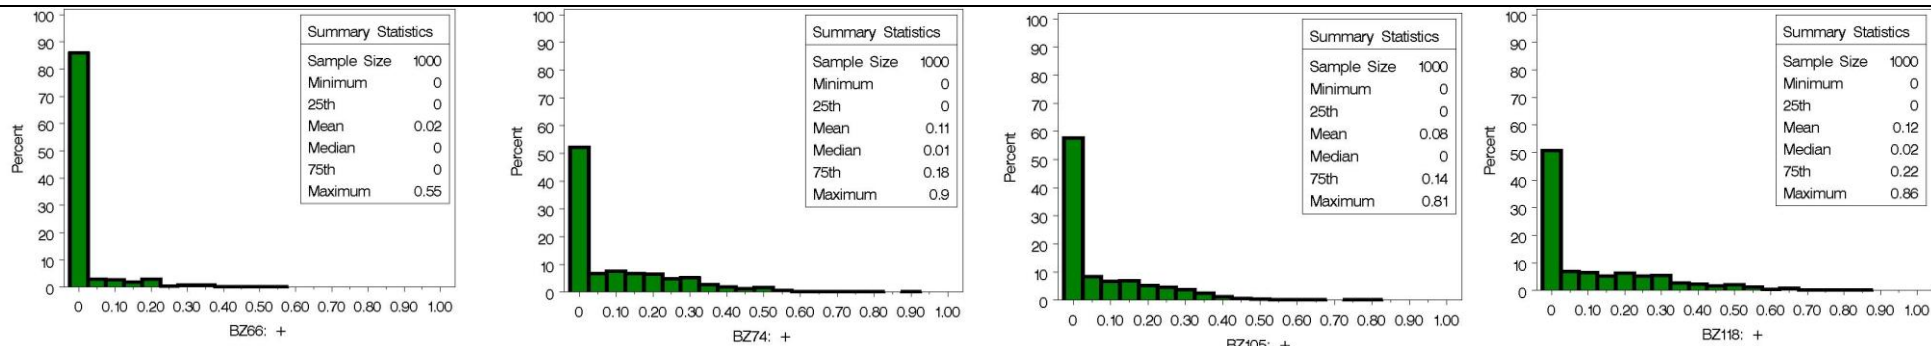

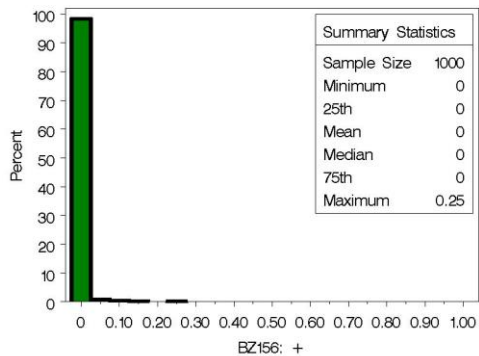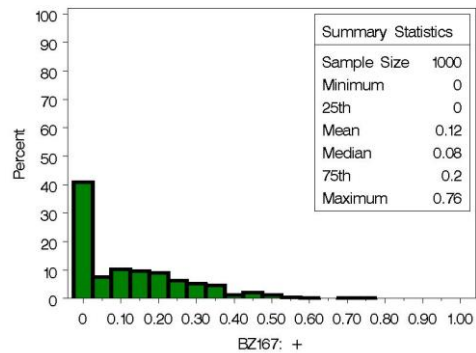

## Anti-estrogenic, immunotoxic, limited dioxin-like activity (di-ortho)

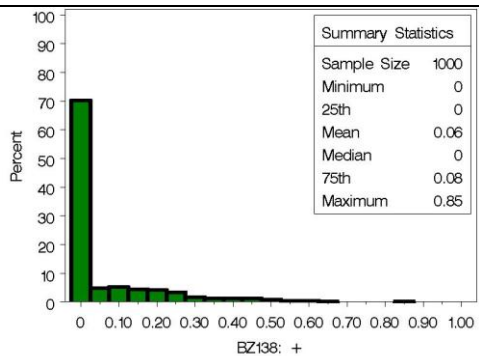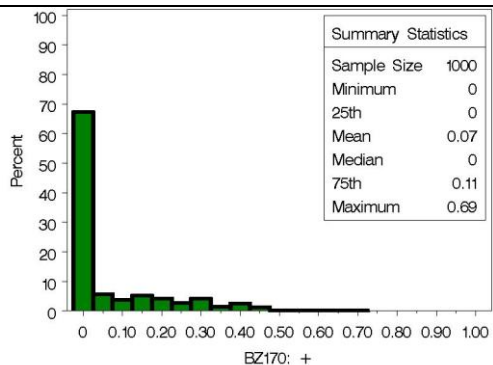

## Phenobarbital, CYP1A, CYP2B inducers

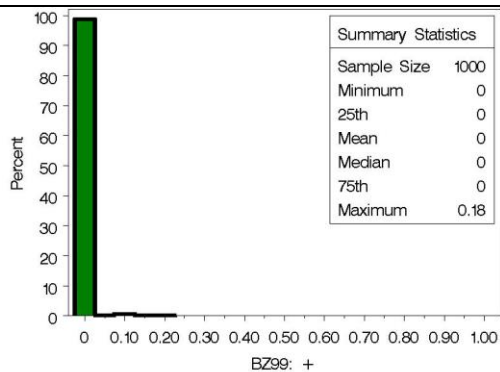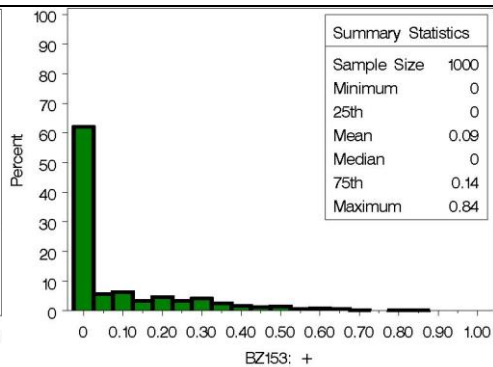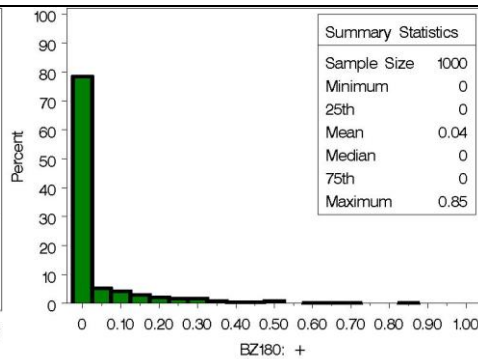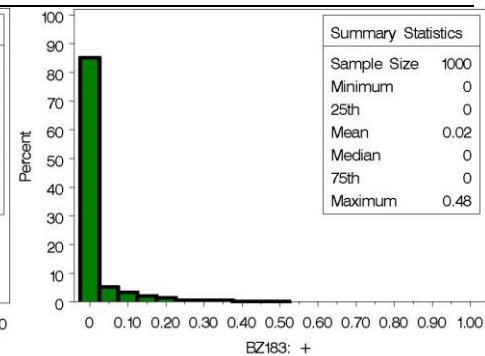

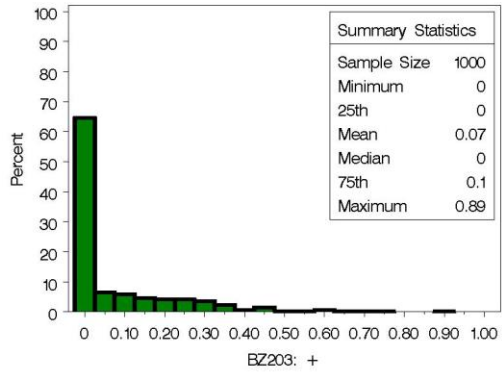

## Not categorized by Wolff et al

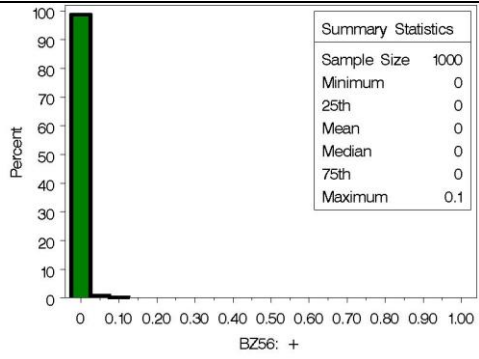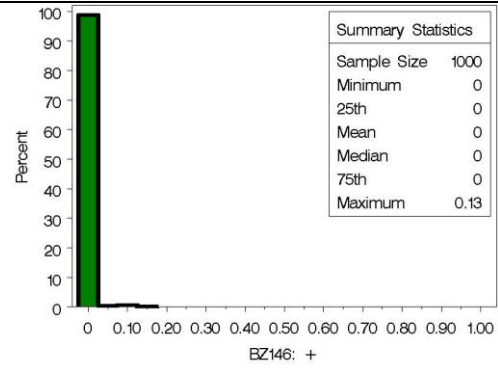

**Figure S2:** Histograms for bootstrap distributions of weights for the PCB congeners in the weighted quartile score with a negative slope parameter in a Weibull proportional hazards model adjusted for race (African American vs all other) and whether the daughter was breast fed (yes or no).

**Estrogenic and persistent**

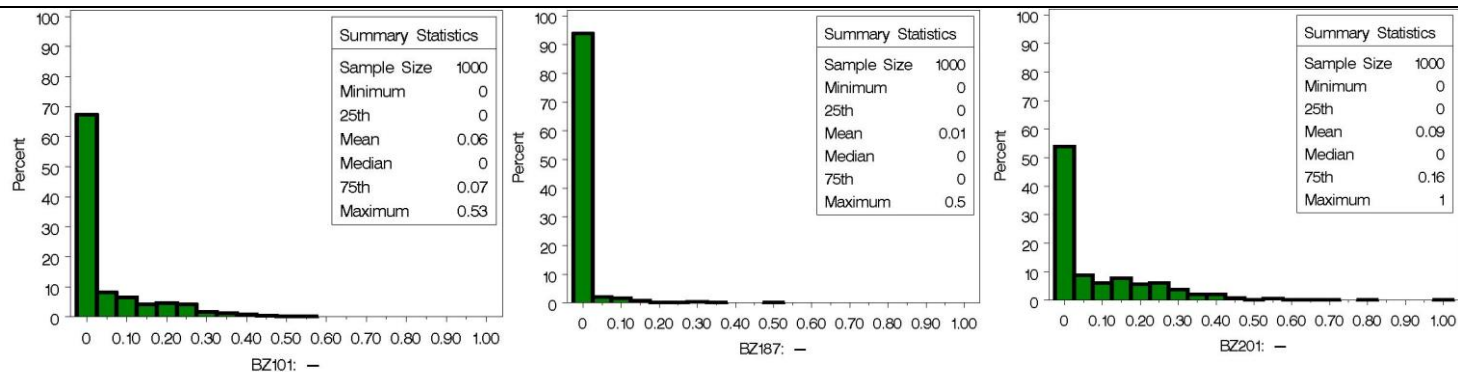

**Anti-estrogenic, immunotoxic, dioxin like (non-ortho, mono-ortho)**

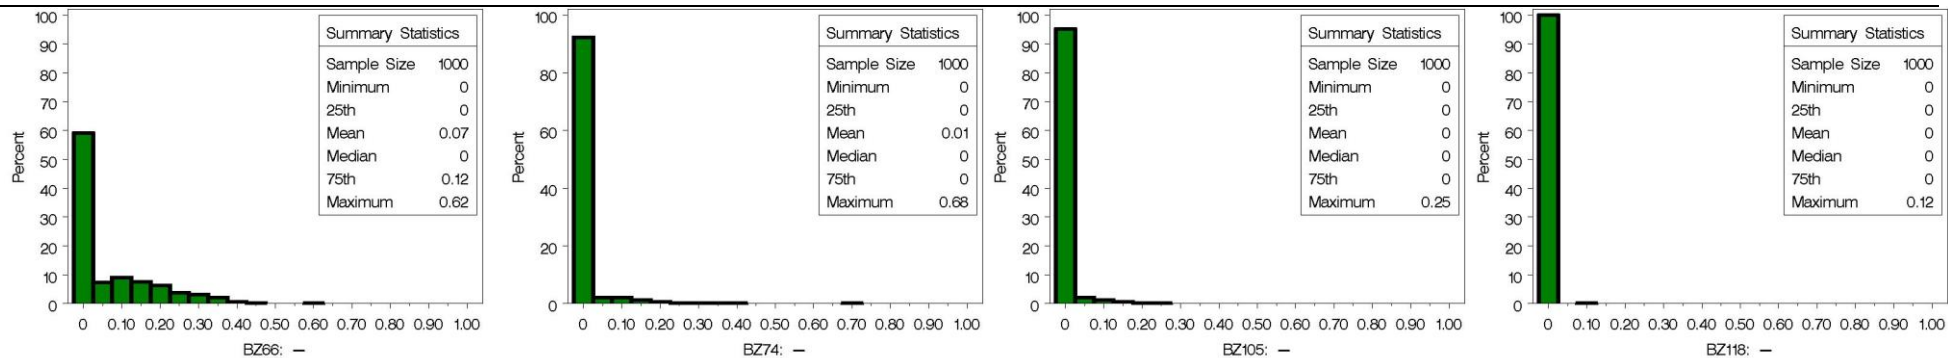

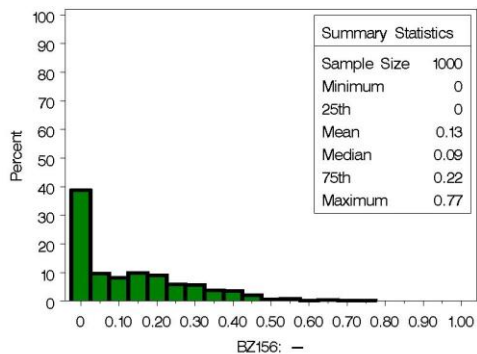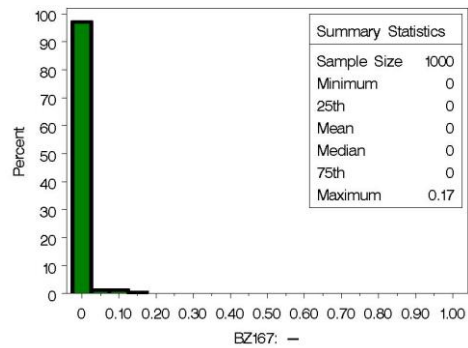

## Anti-estrogenic, immunotoxic, limited dioxin-like activity (di-ortho)

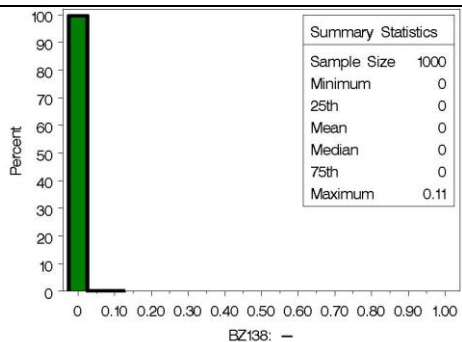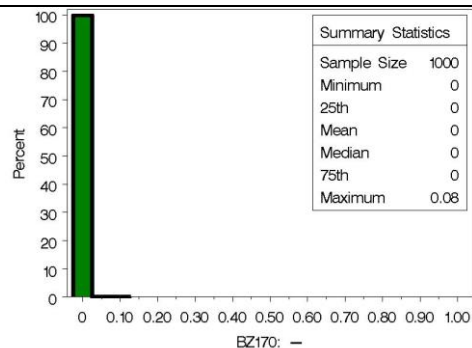

## Phenobarbital, CYP1A, CYP2B inducers

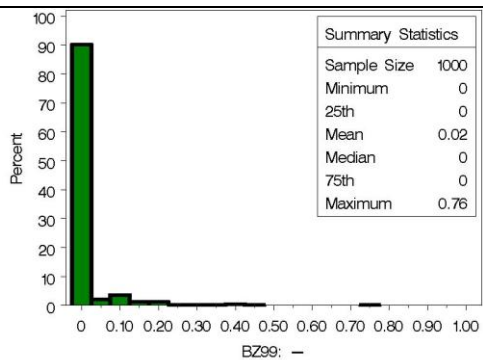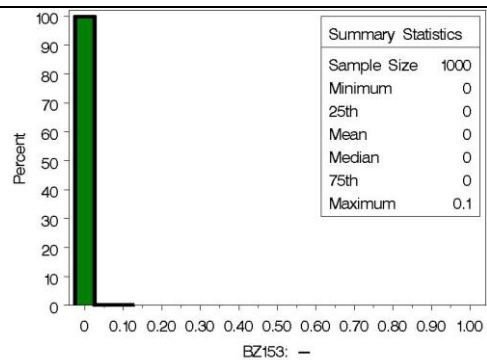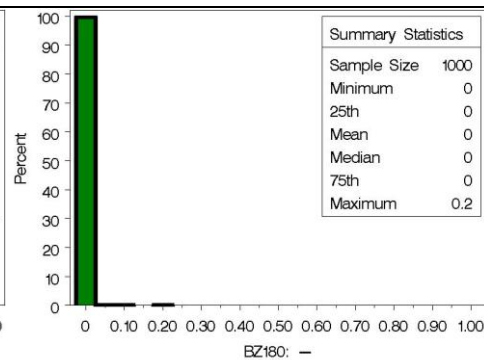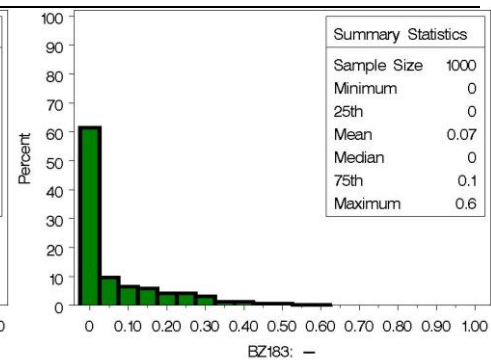

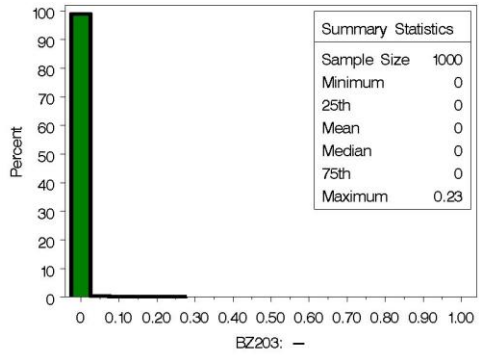

## Not categorized by Wolff et al

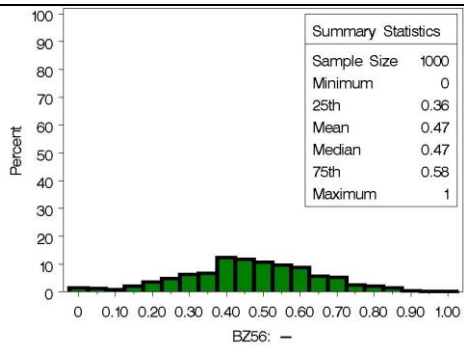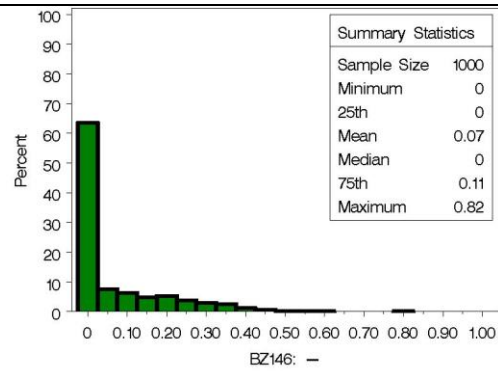

Supplement: 1476-069X-12-66-S1.pdf [file 1476-069X-12-66-S1.pdf]
